# Supplementary material for: Probability Score to Predict Spontaneous Conversion to Sinus Rhythm in Patients with Symptomatic Atrial Fibrillation When Less Could Be More?
Source: MDPI journal article supplement (doi:10.3390/jcm13051470), 2024-03-03
Supplement: s1 [file s1]

## SUPPLEMENTARY MATERIAL

|                                               | Included Population (n=748) | Excluded population (n=221) | p-value |
|-----------------------------------------------|-----------------------------|-----------------------------|---------|
| <b>Clinical, ECG and Echo Characteristics</b> |                             |                             |         |
| Age, years (IQR)                              | 69 (20)                     | 69 (20)                     | 0.701   |
| Female, n (%)                                 | 314 (42%)                   | 84 (38%)                    | 0.291   |
| Heart rate, bpm (IQR)                         | 120 (40)                    | 140 (20)                    | 0.159   |
| LVEF, % (IQR)                                 | 55 (5)                      | 55 (6)                      | 0.176   |
| TAPSE, mm (IQR)                               | 20 (7)                      | 20 (6)                      | 0.077   |
| IVC, mm (IQR)                                 | 15 (2)                      | 15 (2)                      | 0.921   |
| <b>Comorbidities</b>                          |                             |                             |         |
| HTN, n (%)                                    | 483 (64.6%)                 | 152 (69%)                   | 0.247   |
| DM, n (%)                                     | 85 (11.4%)                  | 18 (8%)                     | 0.172   |
| Dyslipidemia, n (%)                           | 247 (33%)                   | 66 (30%)                    | 0.377   |
| Current smoker, n (%)                         | 77 (10.3%)                  | 29 (13%)                    | 0.158   |
| Family history of CVD, n (%)                  | 97 (13%)                    | 33 (15%)                    | 0.316   |
| HF, n (%)                                     | 72 (9.6%)                   | 15 (7%)                     | 0.194   |
| IHD, n (%)                                    | 115 (15.4%)                 | 32 (14.7%)                  | 0.744   |
| Previous TIA/stroke, n (%)                    | 5 (0.7%)                    | 3 (1.5%)                    | 0.319   |
| COPD, n (%)                                   | 36 (4.8%)                   | 15 (7%)                     | 0.248   |
| VHD, n (%)                                    | 64 (8.6%)                   | 18 (8%)                     | 0.846   |
| <b>AF history</b>                             |                             |                             |         |
| First AF episode, n (%)                       | 348 (46.5%)                 | 91 (41%)                    | 0.160   |
| Previous SCV, n (%)                           | 192 (25.7%)                 | 60 (27.5%)                  | 0.659   |
| Previous ECV/PCV, n (%)                       | 253 (33.8%)                 | 88 (40%)                    | 0.101   |
| Previous FA ablation, n (%)                   | 11 (1.5%)                   | 2 (1.1%)                    | 0.520   |
| AF symptoms < 24 h, n (%)                     | 487 (65.1%)                 | 128 (58%)                   | 0.051   |
| AF symptoms duration, h (IQR)                 | 7 (12)                      | 7 (11)                      | 0.114   |
| CHA2DS2VASc score (IQR)                       | 2 (3)                       | 2 (3)                       | 0.098   |
| HAS-BLED (IQR)                                | 2 (1)                       | 2 (1)                       | 0.979   |
| <b>Medication</b>                             |                             |                             |         |

|                                   |               |               |              |
|-----------------------------------|---------------|---------------|--------------|
| Oral anticoagulant therapy, n (%) | 245 (32.8%)   | 84 (38%)      | 0.147        |
| VKA, n (%)                        | 18 (2.4%)     | 7 (3%)        | 0.530        |
| LMWH, n (%)                       | 22 (2.9%)     | 7 (3%)        | 0.862        |
| NOAC, n (%)                       | 227 (30.4%)   | 80 (36%)      | 0.100        |
| Beta blockers, n (%)              | 267 (35.7%)   | 62 (28%)      | <b>0.035</b> |
| ACE blocker/AT-2 blocker, n (%)   | 276 (36.9%)   | 86 (39%)      | 0.586        |
| MRA, n (%)                        | 38 (5.1%)     | 18 (8%)       | 0.086        |
| SGLT2i, n (%)                     | 65 (8.7%)     | 12 (5.3%)     | 0.115        |
| Statin, n (%)                     | 224 (29.9%)   | 77 (34.7%)    | 0.167        |
| Amiodarone, n (%)                 | 22 (2.9%)     | 10 (4.6%)     | 0.247        |
| Flecainide, n (%)                 | 90 (12%)      | 33 (15%)      | 0.255        |
| Propafenone, n (%)                | 18 (2.4%)     | 7 (3%)        | 0.530        |
| <b>Laboratory</b>                 |               |               |              |
| Hemoglobin, g/dl (IQR)            | 13.3 (2.4)    | 13.3 (2.6)    | 0.166        |
| Creatinine, mg/dl (IQR)           | 0.9 (0.2)     | 0.9 (0.2)     | 0.252        |
| Potassium, mmol/l (IQR)           | 4 (0.35)      | 4 (0.33)      | 0.719        |
| Sodium, mmol/l (IQR)              | 140 (2)       | 140 (2)       | 0.600        |
| hs-Troponin T, mcg/l (IQR)        | 0.014 (0.019) | 0.014 (0.018) | 0.838        |
| D Dimer, mg/dl (IQR)              | 350 (233)     | 343 (235)     | 0.703        |
| LDH, U/l (IQR)                    | 207 (52)      | 205 (53)      | 0.755        |
| CRP, mg/dl (IQR)                  | 0.13 (0.44)   | 0.13 (0.42)   | 0.074        |

**Table S1.** Demographics and baseline characteristics of derivation cohort in according to age, sex and baseline oral anticoagulation therapy (OAT)

ACE:angiotensin converting enzyme; AF:atrial fibrillation; AT:angiotensin; COPD:chronic obstructive pulmonary disease; CRP:C-reactive protein; CV:cardioversion; CVD: cardiovascular disease; DM:diabetes mellitus; ECV:electrical cardioversion; HF: heart failure; hs:high-sensitive; HTN: hypertension; IHD:ischemic heart disease; IQR: interquartile range; IVC: inferior vena cava; LDH:lactate dehydrogenase; LMWH: low-molecular weight heparin; LVEF: left ventricular ejection fraction; MRA: mineralcorticoid receptor antagonist; NOAC:novel oral anticoagulants; PCV: pharmacological cardioversion; SCV:spontaneous conversion; SGLT2i: sodium-glucose cotransporter-2 inhibitors; TAPSE: tricuspid annular plan excursion;TIA:transient ischemic attack; VKA: vitamin K antagonist.

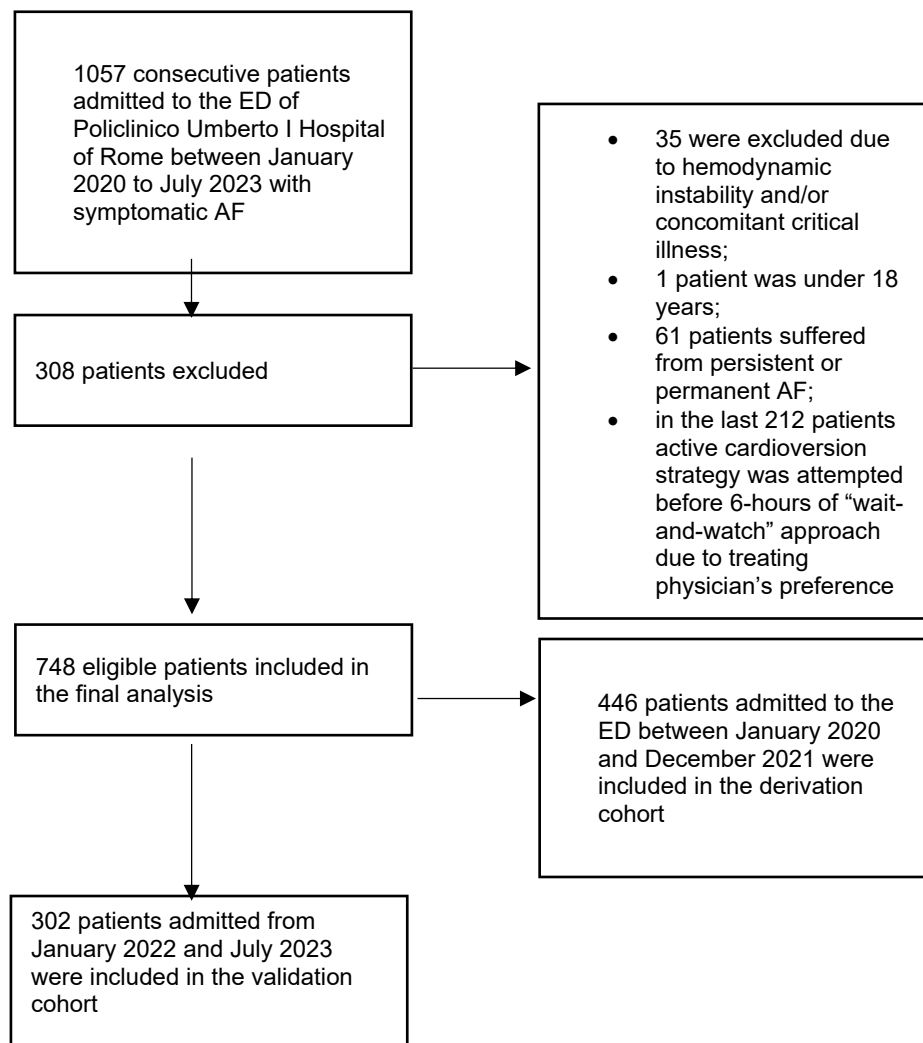

**Table S2. Flow Chart of included and excluded patients in the study.**

AF: atrial fibrillation; ED: emergency department

|                                               | Age (n=446)           |                      |                  | Anticoagulation Status (n=446) |                           |                  | Sex (n=446)     |                   |                  |
|-----------------------------------------------|-----------------------|----------------------|------------------|--------------------------------|---------------------------|------------------|-----------------|-------------------|------------------|
|                                               | < 65 years<br>(n=133) | ≥65 years<br>(n=313) | p-value          | Off chronic OAT<br>(n=273)     | On chronic OAT<br>(n=173) | p-value          | Male<br>(n=238) | Female<br>(n=208) | p-value          |
| <b>Clinical, ECG and Echo Characteristics</b> |                       |                      |                  |                                |                           |                  |                 |                   |                  |
| Age ≥65 years, n (%)                          |                       |                      |                  | 164<br>(60.1%)                 | 149<br>(86.1%)            | <b>&lt;0.001</b> | 139<br>(58.4%)  | 174<br>(83.7%)    | <b>&lt;0.001</b> |
| Female, n (%)                                 | 34<br>(25.6%)         | 174<br>(55.6%)       | <b>&lt;0.001</b> | 116<br>(42.5%)                 | 92<br>(53.2%)             | <b>0.027</b>     |                 |                   |                  |
| Heart rate, bpm (IQR)                         | 120<br>(40)           | 115<br>(35)          | 0.200            | 120<br>(30)                    | 110<br>(30)               | 0.093            | 110<br>(32.5)   | 120 (40)          | <b>0.040</b>     |
| LVEF, % (IQR)                                 | 55 (5)                | 55 (5)               | <b>&lt;0.001</b> | 55 (5)                         | 55 (5)                    | <b>0.002</b>     | 55 (1)          | 55 (5)            | 0.296            |
| TAPSE, mm (IQR)                               | 19 (3)                | 18 (5)               | 0.068            | 19 (6)                         | 18 (5)                    | 0.111            | 19 (5)          | 18 (5)            | 0.732            |
| IVC, mm (IQR)                                 | 15 (4)                | 15 (4)               | 0.471            | 14 (4)                         | 15 (4)                    | 0.766            | 15 (4)          | 15 (4)            | 0.349            |
| <b>Comorbidities</b>                          |                       |                      |                  |                                |                           |                  |                 |                   |                  |
| HTN, n (%)                                    | 50<br>(37.6%)         | 239<br>(76.4%)       | <b>&lt;0.001</b> | 150<br>(54.9%)                 | 139<br>(80.3%)            | <b>&lt;0.001</b> | 140<br>(58.8%)  | 149<br>(71.6%)    | <b>0.005</b>     |
| DM, n (%)                                     | 11<br>(8.3%)          | 46<br>(14.7%)        | 0.063            | 31<br>(11.4%)                  | 26<br>(15%)               | 0.258            | 30<br>(12.6%)   | 27<br>(13%)       | 0.906            |
| Dyslipidemia, n (%)                           | 20<br>(15%)           | 121<br>(38.7%)       | <b>&lt;0.001</b> | 75<br>(24%)                    | 66<br>(38.2%)             | <b>0.018</b>     | 65<br>(27.3%)   | 76<br>(36.5%)     | <b>0.037</b>     |
| Current smoker, n (%)                         | 13<br>(9.8%)          | 26<br>(8.3%)         | 0.616            | 26<br>(8.3%)                   | 13<br>(7.5%)              | 0.464            | 22<br>(9.2%)    | 17<br>(8.2%)      | 0.690            |

|                              |            |             |                  |             |            |                  |             |             |              |
|------------------------------|------------|-------------|------------------|-------------|------------|------------------|-------------|-------------|--------------|
| Family history of CVD, n (%) | 13 (9.8%)  | 42 (13.4%)  | 0.284            | 37 (13.5%)  | 18 (10.4%) | 0.324            | 28 (11.8%)  | 27 (13%)    | 0.696        |
| HF, n (%)                    | 8 (6%)     | 42 (13.4%)  | <b>0.023</b>     | 20 (7.3%)   | 30 (17.3%) | <b>0.001</b>     | 35 (14.7%)  | 15 (7.2%)   | <b>0.012</b> |
| IHD, n (%)                   | 11 (8.3%)  | 59 (17.9%)  | <b>0.005</b>     | 18 (6.6%)   | 52 (30.1%) | <b>&lt;0.001</b> | 49 (20.6%)  | 21 (10.1%)  | <b>0.002</b> |
| Previous TIA/stroke, n (%)   | 1 (0.8%)   | 2 (0.6%)    | 0.893            | 2 (0.7%)    | 1 (0.6%)   | 0.845            | 2 (0.8%)    | 1 (0.5%)    | 0.643        |
| COPD, n (%)                  | 3 (2.3%)   | 23 (7.3%)   | <b>0.036</b>     | 14 (5.1%)   | 12 (6.9%)  | 0.427            | 11 (4.6%)   | 15 (7.2%)   | 0.244        |
| VHD, n (%)                   | 14 (10.5%) | 20 (6.4%)   | 0.132            | 18 (6.6%)   | 16 (9.2%)  | 0.303            | 19 (7.9%)   | 15 (7.2%)   | 0.759        |
| <b>AF history</b>            |            |             |                  |             |            |                  |             |             |              |
| SCV, n (%)                   | 40 (30.1%) | 136 (43.5%) | <b>0.008</b>     | 121 (44.3%) | 55 (31.8%) | <b>0.008</b>     | 81 (34%)    | 95 (45.7%)  | <b>0.012</b> |
| First AF episode, n (%)      | 67 (50.4%) | 153 (48.9%) | 0.773            | 181 (66.3%) | 39 (22.5%) | <b>&lt;0.001</b> | 121 (50.8%) | 99 (47.6%)  | 0.494        |
| Previous SCV, n (%)          | 31 (23.3%) | 63 (20.1%)  | 0.451            | 46 (14.7%)  | 48 (27.7%) | <b>0.006</b>     | 51 (21.4%)  | 43 (20.7%)  | 0.845        |
| Previous ECV/PCV, n (%)      | 77 (57.9%) | 102 (32.6%) | <b>&lt;0.001</b> | 96 (30.7%)  | 83 (48%)   | <b>0.007</b>     | 112 (47.1%) | 67 (32.2%)  | <b>0.001</b> |
| Previous FA ablation, n (%)  | 3 (2.3%)   | 4 (1.2%)    | 0.989            | 1 (0.4%)    | 6 (3.5%)   | <b>0.010</b>     | 5 (2.1%)    | 2 (1%)      | 0.334        |
| AF symptoms < 24 h, n (%)    | 79 (59.4%) | 158 (50.5%) | 0.918            | 150 (54.9%) | 87 (79.1%) | <b>0.013</b>     | 130 (85%)   | 107 (86.3%) | 0.755        |

|                                   |            |             |                  |            |             |                  |            |             |                  |
|-----------------------------------|------------|-------------|------------------|------------|-------------|------------------|------------|-------------|------------------|
| AF symptoms duration, h (IQR)     | 5 (12.7)   | 6 (16.5)    | 0.797            | 5 (9)      | 8 (21)      | <b>0.002</b>     | 5 (21)     | 6.5 (9)     | 0.508            |
| CHA2DS2VASc score (IQR)           | 1 (2)      | 3 (2)       | <b>0.001</b>     | 2 (2)      | 3 (2)       | <b>&lt;0.001</b> | 2 (2)      | 3 (1)       | <b>0.001</b>     |
| HAS-BLED (IQR)                    | 0 (1)      | 2 (1)       | <b>0.001</b>     | 1 (2)      | 2 (1)       | <b>&lt;0.001</b> | 1 (2)      | 2 (1)       | <b>&lt;0.001</b> |
| <b>Medication</b>                 |            |             |                  |            |             |                  |            |             |                  |
| Oral anticoagulant therapy, n (%) | 24 (18%)   | 149 (47.6%) | <b>&lt;0.001</b> |            |             |                  | 81 (34%)   | 92 (44.2%)  | <b>0.027</b>     |
| VKA, n (%)                        | 1 (0.8%)   | 11 (3.5%)   | 0.119            | 0 (0%)     | 12 (6.9%)   | <b>&lt;0.001</b> | 6 (2.5%)   | 6 (2.9%)    | 0.813            |
| LMWH, n (%)                       | 5 (3.8%)   | 15 (4.8%)   | 0.630            | 1 (0.4%)   | 19 (11%)    | <b>&lt;0.001</b> | 10 (4.2%)  | 10 (4.8%)   | 0.758            |
| NOAC, n (%)                       | 19 (14.3%) | 123 (39.3%) | <b>&lt;0.001</b> | 0 (0%)     | 142 (82.1%) | <b>&lt;0.001</b> | 66 (27.7%) | 76 (36.5%)  | <b>0.046</b>     |
| Beta blockers, n (%)              | 38 (28.6%) | 157 (59.2%) | <b>&lt;0.001</b> | 88 (32.2%) | 107 (61.8%) | <b>&lt;0.001</b> | 95 (39.9%) | 100 (48.1%) | 0.083            |
| ACE blocker/AT-2 blocker, n (%)   | 42 (31.6%) | 118 (37.7%) | 0.217            | 89 (32.6%) | 71 (41%)    | 0.070            | 80 (33.6%) | 80 (38.5%)  | 0.518            |
| MRA, n (%)                        | 4 (3%)     | 20 (6.4%)   | 0.148            | 11 (4%)    | 13 (7.5%)   | 0.112            | 10 (4.2%)  | 14 (6.7%)   | 0.238            |
| SGLT2i, n (%)                     | 10 (7.5%)  | 25 (8%)     | 0.866            | 23 (8.4%)  | 12 (6.9%)   | 0.568            | 19 (7.9%)  | 16 (7.7%)   | 0.909            |
| Statin, n (%)                     | 36 (27.1%) | 90 (28.8%)  | 0.717            | 65 (23.8%) | 61 (35.3%)  | <b>0.009</b>     | 64 (26.9%) | 62 (29.8%)  | 0.495            |
| Amiodarone, n (%)                 | 1 (0.8%)   | 15 (4.8%)   | <b>0.036</b>     | 4 (1.5%)   | 12 (6.9%)   | <b>0.002</b>     | 8 (3.4%)   | 8 (3.8%)    | 0.784            |
| Flecainide, n (%)                 | 14 (10.5%) | 46 (14.7%)  | 0.238            | 17 (6.2%)  | 43 (24.9%)  | <b>&lt;0.001</b> | 32 (13.4%) | 28 (13.5%)  | 0.996            |

|                            |               |               |                  |               |               |                  |               |               |                  |
|----------------------------|---------------|---------------|------------------|---------------|---------------|------------------|---------------|---------------|------------------|
| Propafenone, n (%)         | 3 (2.3%)      | 11 (3.5%)     | 0.486            | 10 (3.7%)     | 4 (2.3%)      | 0.425            | 7 (2.9%)      | 7 (3.4%)      | 0.798            |
| <b>Laboratory</b>          |               |               |                  |               |               |                  |               |               |                  |
| Hemoglobin, g/dl (IQR)     | 15 (2)        | 13.4 (2.1)    | <b>&lt;0.001</b> | 14.2 (2.3)    | 13.5 (2.3)    | <b>&lt;0.001</b> | 14.8 (2.1)    | 13.2 (1.8)    | <b>&lt;0.001</b> |
| Creatinine, mg/dl (IQR)    | 0.9 (0.2)     | 0.9 (0.3)     | 0.475            | 0.9 (0.2)     | 0.9 (0.3)     | <b>0.019</b>     | 1 (0.2)       | 0.8 (0.3)     | <b>&lt;0.001</b> |
| Potassium, mmol/l (IQR)    | 140 (3)       | 140 (4)       | 0.367            | 140 (4)       | 140 (4)       | <b>0.027</b>     | 140 (3)       | 140 (4)       | 0.243            |
| Sodium, mmol/l (IQR)       | 3 (0.64)      | 4 (0.66)      | <b>0.017</b>     | 3.9 (0.7)     | 4 (0.57)      | 0.720            | 3.99 (0.69)   | 3.91 (0.65)   | 0.211            |
| hs-Troponin T, mcg/l (IQR) | 0.011 (0.011) | 0.016 (0.021) | <b>&lt;0.001</b> | 0.013 (0.016) | 0.019 (0.021) | <b>0.002</b>     | 0.013 (0.014) | 0.015 (0.020) | 0.071            |
| D Dimer, mg/dl (IQR)       | 319 (260)     | 446 (551)     | <b>0.004</b>     | 441 (478)     | 373 (304)     | 0.323            | 313 (353)     | 480 (497)     | <b>&lt;0.001</b> |
| LDH, U/l (IQR)             | 191 (66)      | 198 (53)      | 0.485            | 194 (52)      | 200 (59)      | 0.484            | 192 (50)      | 201 (65)      | <b>0.003</b>     |
| CRP, mg/dl (IQR)           | 0.15 (0.42)   | 0.25 (0.73)   | <b>0.014</b>     | 0.21 (0.56)   | 0.23 (0.6)    | 0.508            | 0.17 (0.59)   | 0.24 (0.55)   | 0.167            |

**Table S3.** Demographics and baseline characteristics of derivation cohort in according to age, sex and baseline oral anticoagulation therapy (OAT)

ACE:angiotensin converting enzyme; AF:atrial fibrillation; AT:angiotensin; COPD:chronic obstructive pulmonary disease; CRP:C-reactive protein; CV:cardioversion; CVD: cardiovascular disease; DM:diabetes mellitus; ECV:electrical cardioversion; HF: heart failure; hs:high-sensitive; HTN: hypertension; IHD:ischemic heart disease; IQR: interquartile range; IVC: inferior vena cava; LDH:lactate dehydrogenase; LMWH: low-molecular weight heparin; LVEF: left ventricular ejection fraction; MRA: mineralcorticoid receptor antagonist; NOAC:novel oral anticoagulants; PCV: pharmacological cardioversion; SCV:spontaneous conversion; SGLT2i: sodium-glucose cotransporter-2 inhibitors; TAPSE: tricuspid annular plan excursion;TIA:transient ischemic attack; VKA: vitamin K antagonist.
